# Supplementary material for: Machine-learning-assisted discovery of boron-doped graphene with high work function as an anode material for Li/Na/K-ion batteries
Source: Royal Society of Chemistry journal article supplement (doi:10.1039/d3cp00669g), 2023-01-01
Supplement: d3cp00669g1.pdf [file d3cp00669g1.pdf]

## Supporting Information

### Machine-learning-assisted discovery of boron-doped graphene with high work function as anode material for Li/Na/K-ion batteries

Yi Luo,<sup>a</sup> Haiyuan Chen,<sup>\*a</sup> Jianwei Wang<sup>a</sup> and Xiaobin Niu<sup>a</sup>

<sup>a</sup>*School of Materials and Energy, University of Electronic Science and Technology of China, Chengdu 610054, P.R. China*

\*Corresponding author: [hychen@uestc.edu.cn](mailto:hychen@uestc.edu.cn)

**Table.S1.** Size of configuration space ( $N_{conf}$ ) and the number of structures ( $N_{data}$ ) in data set at different doping number ( $n_B$ )

| $n_B$      | 4   | 5    | 6    | 7     | 8     | 9      | 10     |
|------------|-----|------|------|-------|-------|--------|--------|
| $N_{conf}$ | 241 | 1129 | 5002 | 17929 | 55817 | 147362 | 338741 |
| $N_{data}$ | 2   | 4    | 18   | 64    | 198   | 521    | 1197   |

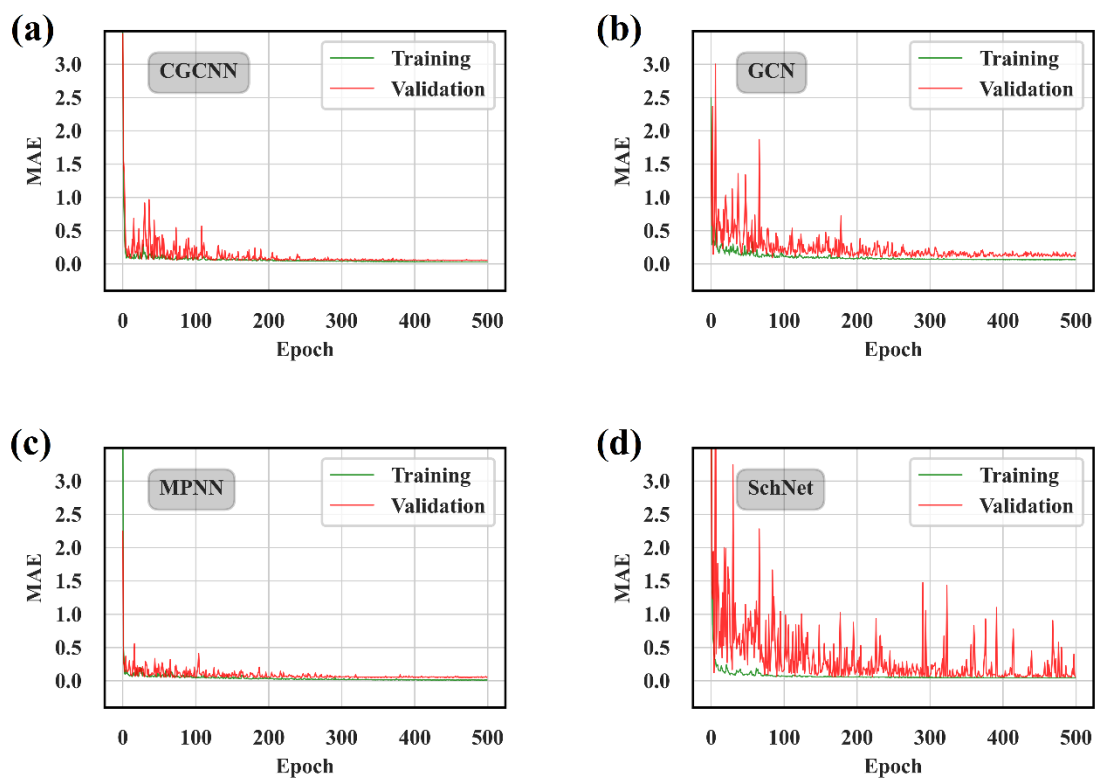

**Fig. S1.** Training/validation MAE of (a) CGCNN, (b) GCN, (c) MPNN, and (d) SchNet models.

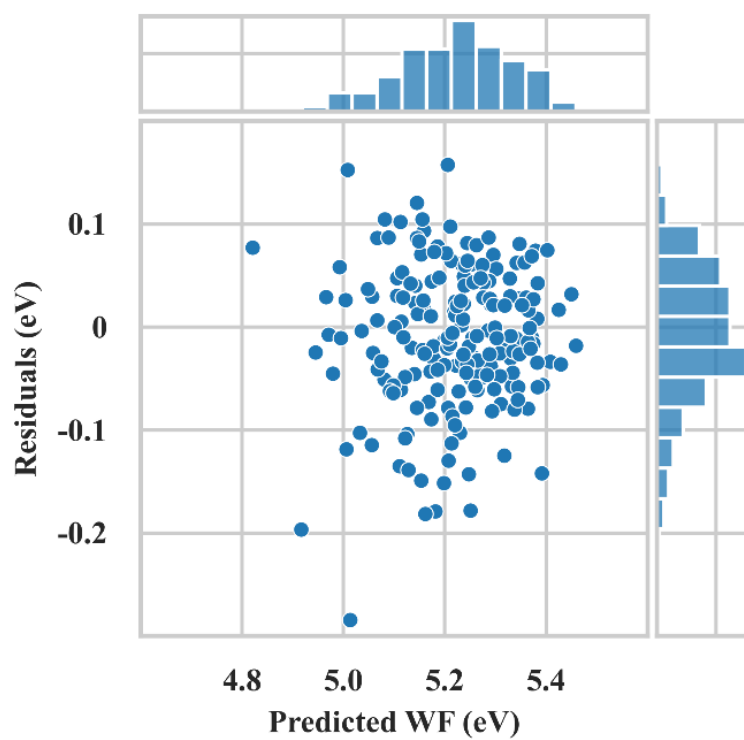

**Fig. S2.** Residuals distribution of the test data set achieved by the CGCNN model.

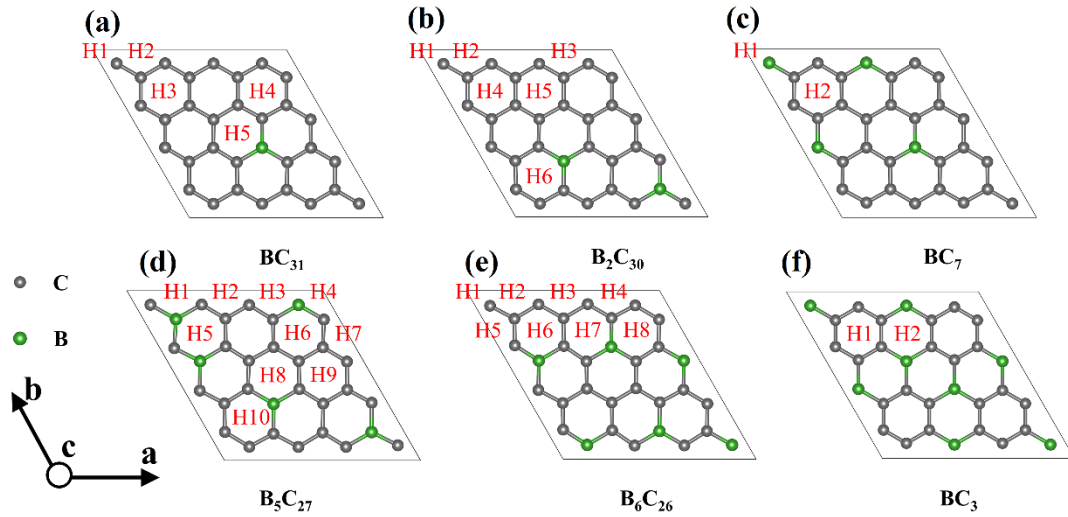

**Fig. S3.** Crystal structures of (a)  $BC_{31}$ , (b)  $B_2C_{30}$ , (c)  $BC_7$ , (d)  $B_5C_{27}$ , (e)  $B_6C_{26}$ , and (f)  $BC_3$ . The hollow sites for alkali metal adsorption are marked with red color.

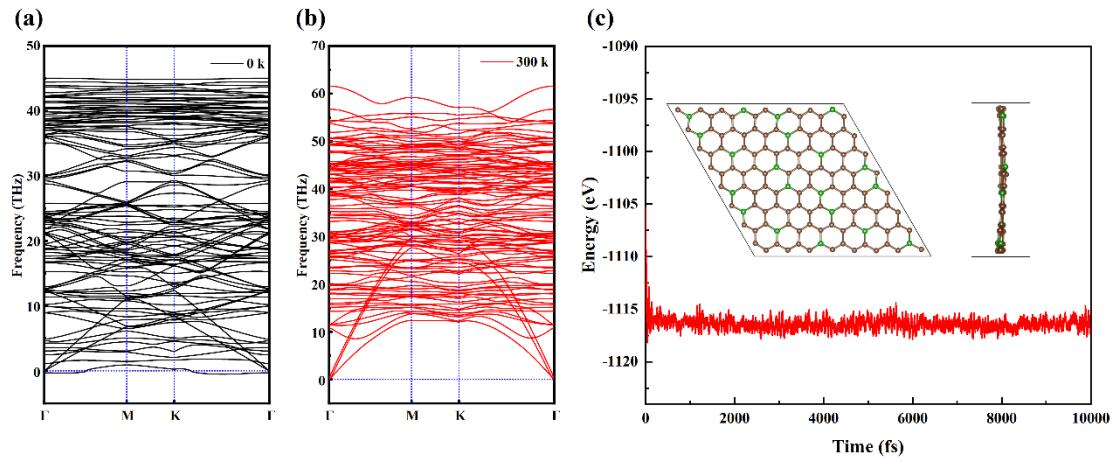

**Fig. S4.** Phonon spectra of  $B_5C_{27}$  at (a) 0 K and (b) 300 K. (c) The energy oscillation of  $B_{20}C_{108}$  in AIMD simulation, and the insets are the top and side views of final snapshot after AIMD simulations for 10 ps at 300 K, with a time step of 1 fs.

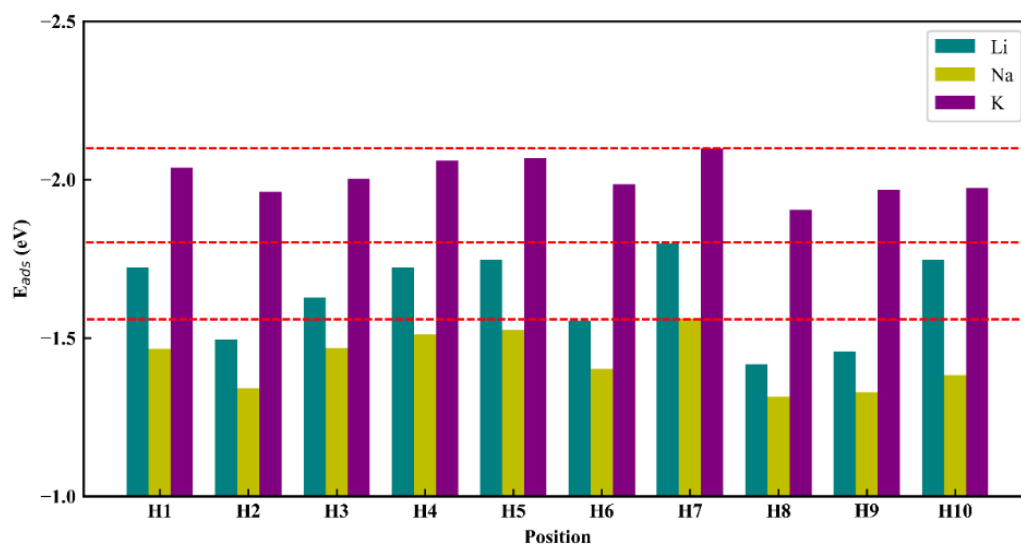

Fig. S5.  $E_{ads}$  of Li/Na/K on different hollow sites in  $B_5C_{27}$ .

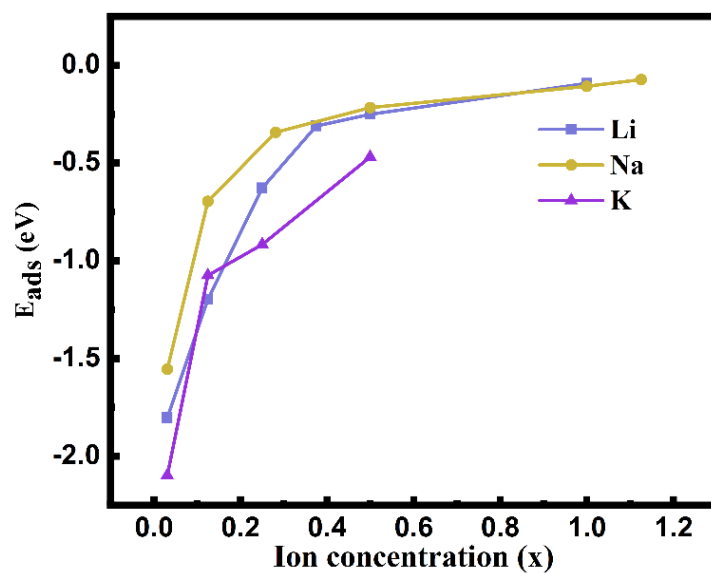

Fig. S6. Adsorption energy as a function of the concentrations of Li/Na/K adatoms.

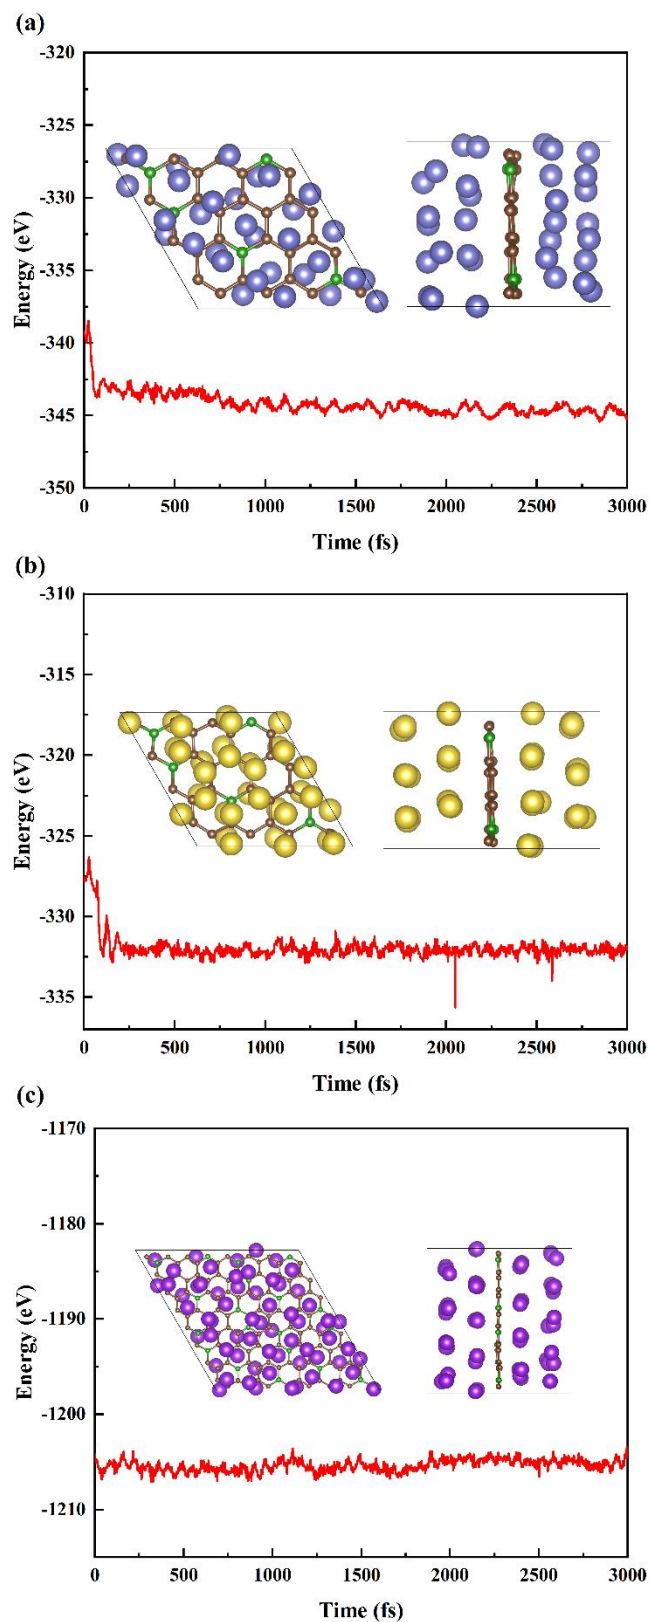

**Fig. S7.** The results of AIMD simulations of (a)  $B_5C_{27}Li_{32}$ , (b)  $B_5C_{27}Na_{36}$ , and (c)  $B_{20}C_{108}K_{64}$ . The insets are the top and side views of final snapshot after AIMD simulation for 3 ps at 300 K, with a time step of 1 fs.
